# Supplementary material for: Accurate Diagnosis and Survival Prediction of Bladder Cancer Using Deep Learning on Histological Slides
Source: MDPI journal article supplement (doi:10.3390/cancers14235807), 2022-11-25
Supplement: s1 [file s1]

## Supplementary Materials

**Supplementary Table S1**

| (a) Dataset distribution of patients and corresponding images in the diagnostic model (BlcaMIL)      |              |                         |                         |                  |
|------------------------------------------------------------------------------------------------------|--------------|-------------------------|-------------------------|------------------|
|                                                                                                      | Patients     | Total images            | Malignant images        | Normal images    |
| TCGA                                                                                                 | 412          | 926                     | 887 (95.79%)            | 39 (4.21%)/740 * |
| RHWU                                                                                                 | 250          | 250                     | 150 (60%)               | 100 (40%)        |
| (b) Dataset distribution of patients and corresponding images in the prognostic model (MibcMLP)      |              |                         |                         |                  |
|                                                                                                      | Patients     | Images                  |                         |                  |
| TCGA                                                                                                 | 326          | 326                     |                         |                  |
| RHWU                                                                                                 | 144          | 144                     |                         |                  |
| (c) Dataset distribution of images in the training, internal validation and external validation sets |              |                         |                         |                  |
|                                                                                                      | Training set | Internal validation set | External validation set |                  |
| BlcaMIL                                                                                              | 1302         | 325                     | 250                     |                  |
| MibcMLP                                                                                              | 190          | 136                     | 144                     |                  |

\* The number of normal images from TCGA after data argumentation.

**Supplementary Table S2.** Cox analyses of prognostic factors in the training set.

| 9                       | Univariate analysis   |                 | Multivariate analysis |                 |
|-------------------------|-----------------------|-----------------|-----------------------|-----------------|
|                         | HR (95%CI)            | <i>p</i> -value | HR (95%CI)            | <i>p</i> -value |
| Age                     |                       |                 |                       |                 |
| < 70                    | Ref.                  |                 |                       |                 |
| ≥70                     | 1.407 (0.928, 2.135)  | 0.108           |                       |                 |
| Sex                     |                       |                 |                       |                 |
| female                  | Ref.                  |                 |                       |                 |
| male                    | 1.003 (0.637, 1.579)  | 0.990           |                       |                 |
| pT stage                |                       |                 |                       |                 |
| pT1-2                   | Ref.                  |                 | Ref.                  |                 |
| pT3-4                   | 1.743 (1.083, 2.803)  | 0.022           | 1.347 (0.801, 2.267)  | 0.262           |
| pN stage                |                       |                 |                       |                 |
| pN0-1                   | Ref.                  |                 | Ref.                  |                 |
| pN2-3                   | 2.118 (1.358, 3.303)  | < 0.001         | 1.010 (0.535, 1.907)  | 0.975           |
| pM stage                |                       |                 |                       |                 |
| pM0                     | Ref.                  |                 | Ref.                  |                 |
| pM1                     | 5.257 (2.258, 12.238) | < 0.001         | 1.418 (0.533, 3.773)  | 0.484           |
| pTNM stage              |                       |                 |                       |                 |
| Stage I-II              | Ref.                  |                 | Ref.                  |                 |
| Stage III-IV            | 2.348 (1.537, 3.587)  | < 0.001         | 1.705 (0.897, 3.240)  | 0.104           |
| Lymphovascular invasion |                       |                 |                       |                 |
| No                      | Ref.                  |                 | Ref.                  |                 |
| Yes                     | 1.538 (1.013, 2.334)  | 0.043           | 1.020 (0.619, 1.680)  | 0.939           |
| Risk score              |                       |                 |                       |                 |
| Low-risk score          | Ref.                  |                 | Ref.                  |                 |
| High-risk score         | 3.888 (2.811, 5.380)  | < 0.001         | 3.474 (2.449, 4.929)  | < 0.001         |

95% CI, 95% Confidence Interval.

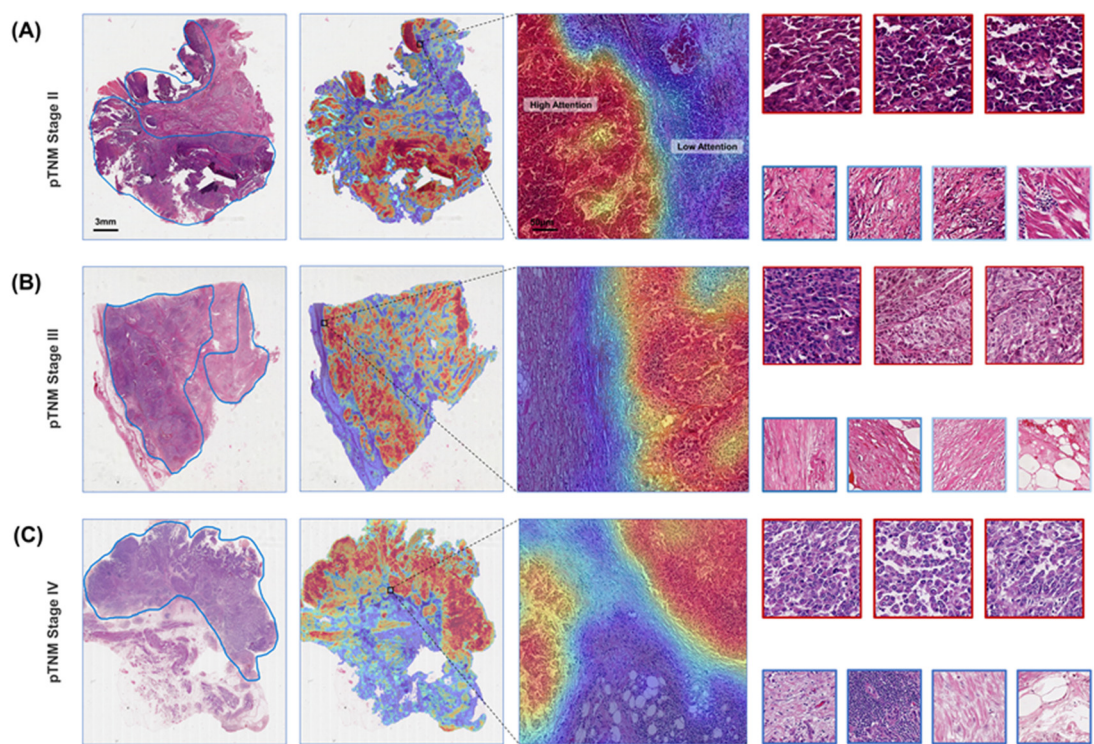

**Supplementary Figure S1.** Heatmaps of diagnostic model (BlcaMIL) on WSI at different pathological stages in the RHWU cohort. (A–C), pathological original images, corresponding heatmaps and representative patches with pathological TNM stage II, III, and IV from the RHWU cohort, respectively.

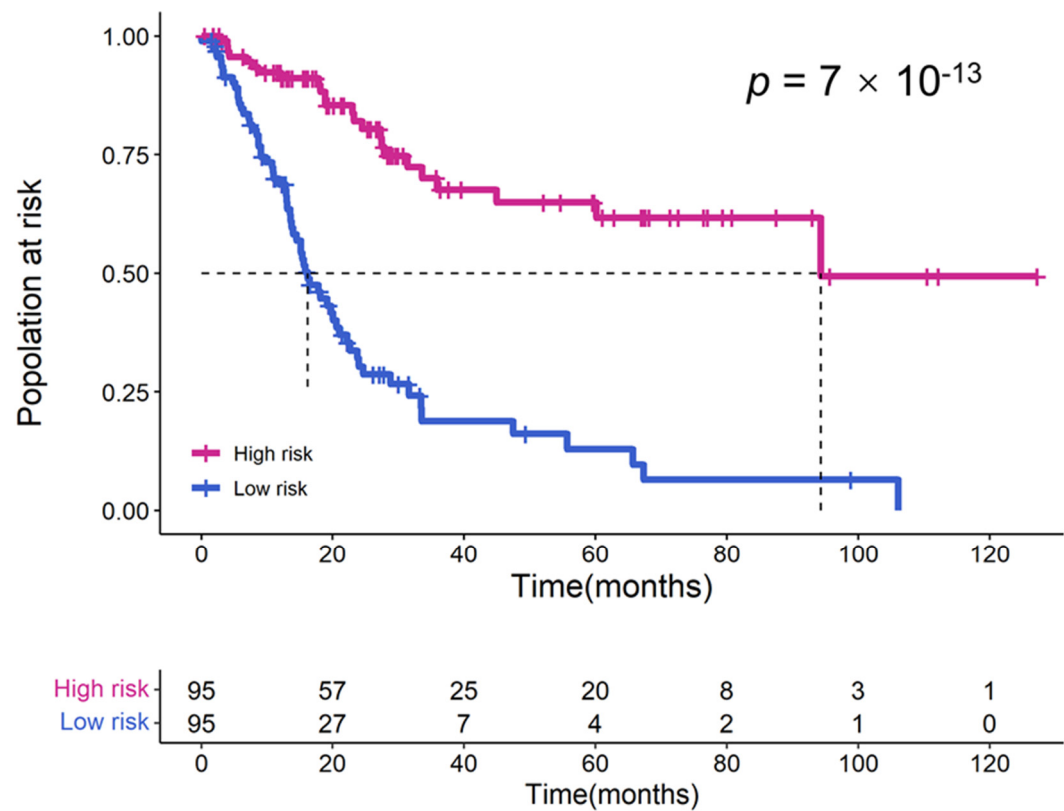

**Supplementary Figure S2.** Prognostic value of MibcMLP-generated risk scores in training set. The  $p$ -value was evaluated by Log-Rank test.
